# Supplementary material for: Differential Metabotypes in Synovial Fibroblasts and Synovial Fluid in Hip Osteoarthritis Patients Support Inflammatory Responses
Source: MDPI journal article supplement (doi:10.3390/ijms23063266), 2022-03-17
Supplement: s1 [file s1]

**Supplementary Table S3: Primer sequences used for RT-PCR**

| <b>Gene Symbol</b> | <b>Forward Sequence<br/>(5'-3')</b> | <b>Reverse Sequence<br/>(5'-3')</b> | <b>Melting Temperature<br/>(T<sub>m</sub>)</b> | <b>G-C percentage<br/>(GC%)</b> |
|--------------------|-------------------------------------|-------------------------------------|------------------------------------------------|---------------------------------|
| <b>18s</b>         | GTAACCCGTTGAACCCCCATT               | CCATCCAATCGGTAGTAGCG                | Fwd: 60.55<br>Rev: 57.93                       | Fwd: 52.38<br>Rev: 55.00        |
| <b>IL6</b>         | GCGCAGCTTTAAGGAGTTCCT               | CCATGCTACATTTGCCGAAGA               | Fwd: 60.95<br>Rev: 58.98                       | Fwd: 52.38<br>Rev: 47.62        |
| <b>GLS1</b>        | GCTGTGCTCCATTGAAGTGA                | GCAAAGTGGCCTGAGAAGTC                | Fwd: 58.47<br>Rev: 59.12                       | Fwd: 50.00<br>Rev: 55.00        |
| <b>Actin</b>       | CCAACCGCGAGAAGATGA                  | CCAGAGGCGTACAGGGATAG                | Fwd: 57.09<br>Rev: 59.04                       | Fwd: 55.56<br>Rev: 60.00        |
