# Supplementary material for: Differential Metabotypes in Synovial Fibroblasts and Synovial Fluid in Hip Osteoarthritis Patients Support Inflammatory Responses
Source: MDPI journal article supplement (doi:10.3390/ijms23063266), 2022-03-17
Supplement: s1 [file s1]

**Supplementary Table S2. Regression analysis of synovial fluid metabolite concentrations with parameters of OA patient body composition.**

|                        | BMI            |              |         | WC (cm)        |              |         | HC (cm)        |              |         | WHR            |              |           |
|------------------------|----------------|--------------|---------|----------------|--------------|---------|----------------|--------------|---------|----------------|--------------|-----------|
|                        | R <sup>2</sup> | Slope        | p-value   |
| 1,3 Dimethylurate      | 0.28           | 9.0 ± 4.8    | 0.09    | 0.13           | 2.0 ± 1.8    | 0.30    | 0.13           | 2.9 ± 2.7    | 0.31    | 0.10           | 390 ± 415    | 0.38      |
| Glucose                | 0.36           | 249 ± 110    | 0.052   | 0.22           | 60 ± 40      | 0.17    | 0.13           | 67 ± 62      | 0.31    | 0.30           | 15700 ± 8400 | 0.1       |
| Glycine                | 0.58           | 13.2 ± 3.7   | 0.006** | 0.60           | 4.0 ± 1.1    | 0.009** | 0.39           | 4.7 ± 2.1    | 0.05    | 0.66           | 935 ± 236    | 0.004**   |
| Lactate                | 0.41           | 145 ± 61     | 0.046*  | 0.56           | 50 ± 17      | 0.02*   | 0.26           | 51 ± 33      | 0.16    | 0.90           | 14500 ± 1900 | 0.0001*** |
| N-Nitrosodimethylamine | 0.36           | 18.4 ± 8.2   | 0.051   | 0.51           | 7.0 ± 2.4    | 0.02*   | 0.34           | 8.4 ± 4.1    | 0.08    | 0.51           | 1560 ± 542   | 0.02*     |
| Pyruvate               | 0.32           | 4.8 ± 2.3    | 0.07    | 0.25           | 1.3 ± 0.8    | 0.15    | 0.13           | 1.4 ± 1.3    | 0.31    | 0.38           | 355 ± 161    | 0.059     |
| Succinate              | 0.50           | 1.1 ± 0.4    | 0.015*  | 0.57           | 0.38 ± 0.11  | 0.01*   | 0.42           | 0.47 ± 0.2   | 0.04*   | 0.52           | 80 ± 28      | 0.019*    |
| Tyrosine               | 0.39           | 3.4 ± 1.4    | 0.046*  | 0.37           | 1.0 ± 0.47   | 0.06    | 0.20           | 1.1 ± 0.8    | 0.20    | 0.52           | 267 ± 92     | 0.019*    |
| Glutamine              | 0.11           | -12.3 ± 14.4 | 0.43    | 0.03           | -2.1 ± 4.7   | 0.17    | 0.04           | -3.5 ± 6.6   | 0.61    | 0.02           | -379 ± 1161  | 0.75      |
| Glutamate              | 0.04           | 22.0 ± 43.7  | 0.63    | 0.29           | 18.4 ± 11.7  | 0.17    | 0.13           | 17.4 ± 18.3  | 0.38    | 0.45           | 5586 ± 2542  | 0.07      |
| Glutamine:Glutamate    | 0.36           | -0.20 ± 0.11 | 0.11    | 0.55           | -0.08 ± 0.03 | 0.036*  | 0.49           | -0.10 ± 0.04 | 0.051   | 0.38           | -15.4 ± 8.0  | 0.11      |

BMI=Body mass index, WC=waist circumference, HC=hip circumference, WHR=waist:hip ratio.
