# Supplementary material for: Differential Metabotypes in Synovial Fibroblasts and Synovial Fluid in Hip Osteoarthritis Patients Support Inflammatory Responses
Source: MDPI journal article supplement (doi:10.3390/ijms23063266), 2022-03-17
Supplement: s1 [file s1]

**Supplementary Table S1. Metabolites detected in OA synovial fluid by NMR spectroscopy**

| Metabolite                  | NW (uM) | OB (uM) | Fold-Change | P-Value |
|-----------------------------|---------|---------|-------------|---------|
| Succinate                   | 4.6     | 17.4    | 3.8         | 0.013   |
| Lactate                     | 899     | 2819    | 3.1         | 0.016   |
| N-Nitrosodimethylamine      | 39.8    | 276     | 6.9         | 0.016   |
| Pyruvate                    | 28.5    | 93.1    | 3.3         | 0.018   |
| Glycine                     | 73.7    | 205     | 2.8         | 0.019   |
| 1,3-Dimethylurate           | 2.8     | 128     | 46.4        | 0.024   |
| Tyrosine                    | 19.2    | 59.2    | 3.1         | 0.025   |
| Glucose                     | 1440    | 4253    | 3.0         | 0.043   |
| Phenylalanine               | 15.9    | 42.0    | 2.6         | 0.050   |
| Valine                      | 69.5    | 227     | 3.3         | 0.064   |
| Urea                        | 1392    | 3584    | 2.6         | 0.067   |
| Acetoacetate                | n.d     | 24.8    | >100        | 0.067   |
| Guanidoacetate              | 33.1    | 89.6    | 2.7         | 0.069   |
| Methanol                    | 34.2    | n.d     | >100        | 0.085   |
| sn-Glycero-3-phosphocholine | 7.9     | 172     | 21.7        | 0.093   |
| Creatine phosphate          | 50.7    | 249.4   | 4.9         | 0.093   |
| 1,3-Dihydroxyacetone        | n.d     | 10.0    | >100        | 0.104   |
| Glycylproline               | n.d     | 176     | >100        | 0.104   |
| 2-Hydroxyisocaproate        | n.d     | 10.8    | >100        | 0.104   |
| N,N-Dimethylglycine         | 0.3     | 139     | 554.2       | 0.105   |
| Pantothenate                | 3.8     | 436     | 116.2       | 0.107   |
| Alloisoleucine              | n.d     | 180     | >100        | 0.108   |
| Glycolate                   | 52.3    | 208     | 4.0         | 0.110   |
| Threonate                   | n.d     | 17.0    | >100        | 0.110   |
| Caprate                     | n.d     | 38.2    | >100        | 0.111   |
| Lysine                      | n.d     | 117     | >100        | 0.116   |
| Cadaverine                  | n.d     | 57.4    | >100        | 0.122   |
| 2-Hydroxyvalerate           | n.d     | 18.8    | >100        | 0.123   |
| Malonate                    | 566     | n.d     | >100        | 0.125   |
| Formate                     | 71.8    | 184     | 2.6         | 0.126   |
| 5-Aminolevulinate           | 3.4     | 159     | 47.1        | 0.138   |
| O-Phosphocholine            | n.d     | 45.4    | >100        | 0.153   |
| Glutamate                   | 47.5    | 563     | 11.8        | 0.154   |
| Galactarate                 | 22.5    | 192     | 8.5         | 0.162   |
| Succinylacetone             | 2.8     | 227     | 82.5        | 0.174   |
| Ethylene glycol             | 1671    | n.d     | >100        | 0.189   |
| Alanine                     | 65.3    | 192     | 2.9         | 0.194   |
| N-Methylhydantoin           | 0.5     | 2.8     | 6.2         | 0.201   |
| Oxypurinol                  | n.d     | 138     | >100        | 0.206   |
| Galactonate                 | 30.4    | n.d     | >100        | 0.207   |
| Hypoxanthine                | 1.5     | 7.9     | 5.5         | 0.221   |
| 3-Hydroxyisovalerate        | 11.7    | 26.8    | 2.3         | 0.230   |
| Hydroxyacetone              | 7.3     | n.d     | >100        | 0.235   |
| Riboflavin                  | n.d     | 10.0    | >100        | 0.251   |
| Trimethylamine N-oxide      | 24.2    | n.d     | >100        | 0.283   |
| 1,7-Dimethylxanthine        | 0.5     | 83.7    | 173.2       | 0.294   |

| Metabolite                   | NW (uM) | OB (uM) | Fold-Change | P-Value |
|------------------------------|---------|---------|-------------|---------|
| N-Acetylglucosamine          | 1.5     | 463     | 312.0       | 0.295   |
| 2-Oxoisocaproate             | n.d     | 4.9     | >100        | 0.297   |
| Caprylate                    | n.d     | 5.5     | >100        | 0.297   |
| Butanone                     | n.d     | 81.9    | >100        | 0.297   |
| Thymidine                    | n.d     | 0.8     | >100        | 0.297   |
| 3,5-Dibromotyrosine          | n.d     | 1.2     | >100        | 0.297   |
| Methylamine                  | n.d     | 1.7     | >100        | 0.297   |
| UDP-N-Acetylglucosamine      | n.d     | 2.6     | >100        | 0.297   |
| N $\alpha$ -Acetyllysine     | n.d     | 2.6     | >100        | 0.297   |
| N-Acetylaspartate            | n.d     | 2.8     | >100        | 0.297   |
| Propylene glycol             | n.d     | 3.3     | >100        | 0.297   |
| N-Acetylcysteine             | n.d     | 3.5     | >100        | 0.297   |
| N-Acetylglutamate            | n.d     | 4.7     | >100        | 0.297   |
| Choline                      | n.d     | 8.9     | >100        | 0.297   |
| ADP                          | n.d     | 9.2     | >100        | 0.297   |
| Isoleucine                   | n.d     | 10.5    | >100        | 0.297   |
| Methionine                   | n.d     | 15.0    | >100        | 0.297   |
| Histidine                    | n.d     | 15.3    | >100        | 0.297   |
| Aspartate                    | n.d     | 16.1    | >100        | 0.297   |
| Galactose                    | n.d     | 16.5    | >100        | 0.297   |
| Valerate                     | n.d     | 17.0    | >100        | 0.297   |
| Isobutyrate                  | n.d     | 21.3    | >100        | 0.297   |
| N-Acetyltyrosine             | n.d     | 24.6    | >100        | 0.297   |
| Lactulose                    | n.d     | 40.5    | >100        | 0.297   |
| Ascorbate                    | n.d     | 45.2    | >100        | 0.297   |
| myo-Inositol                 | n.d     | 107     | >100        | 0.297   |
| Isocitrate                   | n.d     | 165     | >100        | 0.297   |
| Glucitol                     | n.d     | 170     | >100        | 0.297   |
| N-Acetyl glycine             | n.d     | 182     | >100        | 0.297   |
| Glycerate                    | n.d     | 465     | >100        | 0.297   |
| Lactose                      | n.d     | 662     | >100        | 0.297   |
| Arabinose                    | n.d     | 709     | >100        | 0.297   |
| Acetone                      | 21.0    | 3.7     | -5.6        | 0.305   |
| Threonine                    | 12.8    | 720     | 56.4        | 0.305   |
| 3-Hydroxybutyrate            | 126.8   | 262     | 2.1         | 0.316   |
| 3-Methylxanthine             | 8.4     | 25.0    | 3.0         | 0.332   |
| Anserine                     | 41.1    | 116     | 2.8         | 0.345   |
| Glutamine                    | 294.6   | 481     | 1.6         | 0.347   |
| 4-Hydroxy-3-methoxymandelate | 6.4     | 0.9     | -6.8        | 0.372   |
| 5-Hydroxyindole-3-acetate    | 0.6     | n.d     | >100        | 0.389   |
| 2-Hydroxyisovalerate         | 0.7     | n.d     | >100        | 0.389   |
| N-Acetylserotonin            | 0.7     | n.d     | >100        | 0.389   |
| Dimethylamine                | 1.0     | n.d     | >100        | 0.389   |
| N-Acetylornithine            | 1.3     | n.d     | >100        | 0.389   |
| Theophylline                 | 2.4     | n.d     | >100        | 0.389   |
| Carnosine                    | 2.5     | n.d     | >100        | 0.389   |
| Isopropanol                  | 3.0     | n.d     | >100        | 0.389   |
| N-Acetylglutamine            | 7.1     | n.d     | >100        | 0.389   |
| Sebacate                     | 8.1     | n.d     | >100        | 0.389   |

| Metabolite                     | NW (uM) | OB (uM) | Fold-Change | P-Value |
|--------------------------------|---------|---------|-------------|---------|
| Ethanol                        | 11.3    | n.d     | >100        | 0.389   |
| Homovanillate                  | 12.7    | n.d     | >100        | 0.389   |
| Dimethyl sulfone               | 19.8    | n.d     | >100        | 0.389   |
| Leucine                        | 23.5    | n.d     | >100        | 0.389   |
| Carnitine                      | 25.4    | n.d     | >100        | 0.389   |
| Isoeugenol                     | 34.8    | n.d     | >100        | 0.389   |
| cis-Aconitate                  | 67.1    | n.d     | >100        | 0.389   |
| 2-Phosphoglycerate             | 302     | n.d     | >100        | 0.389   |
| Xylose                         | 672     | n.d     | >100        | 0.389   |
| 2-Hydroxyisobutyrate           | 108.0   | 2.0     | -55.1       | 0.395   |
| Acetate                        | 38.8    | 66.3    | 1.7         | 0.427   |
| Pyridoxine                     | 1.9     | 7.9     | 4.2         | 0.438   |
| Galactitol                     | 8.9     | 37.2    | 4.2         | 0.439   |
| N-Isovaleroylglycine           | 1.7     | 6.3     | 3.8         | 0.459   |
| 4-Pyridoxate                   | 8.0     | 19.2    | 2.4         | 0.467   |
| Xanthine                       | 12.1    | 2.1     | -5.7        | 0.479   |
| Acetamide                      | 0.9     | 2.9     | 3.2         | 0.499   |
| 3-Methylhistidine              | 9.6     | 19.7    | 2.0         | 0.508   |
| Creatine                       | 13.9    | 32.2    | 2.3         | 0.566   |
| N,N-Dimethylformamide          | 10.6    | 4.0     | -2.6        | 0.605   |
| 1-Methylhistidine              | 76.9    | 115     | 1.5         | 0.658   |
| Syringate                      | 0.3     | 0.5     | 1.8         | 0.684   |
| Histamine                      | 14.4    | 8.0     | -1.8        | 0.706   |
| Thymine                        | 1.8     | 3.0     | 1.6         | 0.719   |
| O-Acetylcarnitine              | 5.0     | 7.2     | 1.4         | 0.733   |
| Trimethylamine                 | 4.2     | 2.6     | -1.6        | 0.738   |
| 3-Methyl-2-oxovalerate         | 24.5    | 14.4    | -1.7        | 0.745   |
| Imidazole                      | 8.9     | 6.4     | -1.4        | 0.749   |
| Creatinine                     | 22.3    | 27.7    | 1.2         | 0.757   |
| O-Acetylcholine                | 15.0    | 20.8    | 1.4         | 0.782   |
| 3,4-Dihydroxymandelate         | 1.7     | 1.2     | -1.4        | 0.821   |
| Methylguanidine                | 1.3     | 0.9     | -1.4        | 0.842   |
| Sarcosine                      | 9.9     | 7.5     | -1.3        | 0.842   |
| Betaine                        | 209     | 165     | -1.3        | 0.844   |
| Caffeine                       | 13.5    | 14.2    | 1.1         | 0.972   |
| Glutaric acid monomethyl ester | 33.0    | 34.5    | 1.0         | 0.975   |
| 2-Hydroxybutyrate              | 18.8    | 19.2    | 1.0         | 0.982   |
